# Supplementary figures and images for: Enhancing biopharmaceutical parameters of bioflavonoid quercetin by cocrystallization
Source: Royal Society of Chemistry journal article supplement (doi:10.1039/c5ce01899d), 2016-01-01

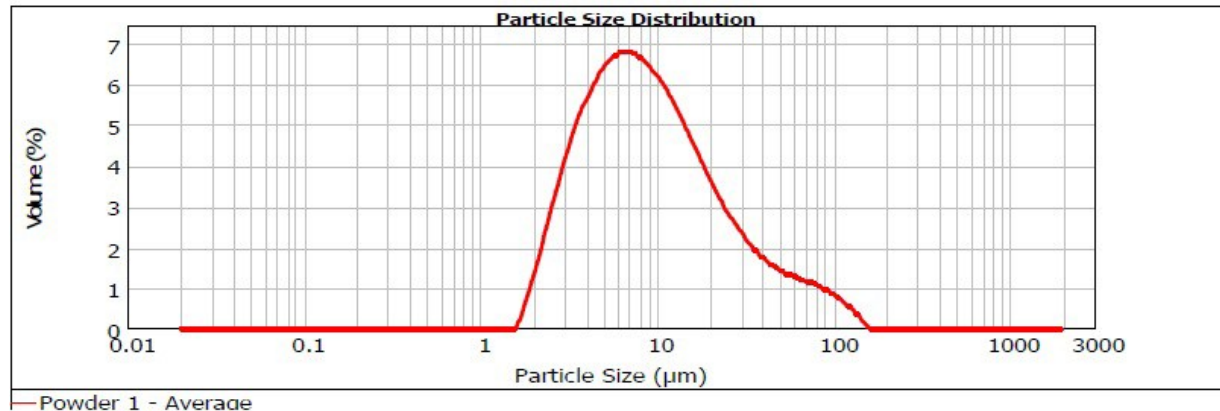

Supplement: c5ce01899d1.pdf [file c5ce01899d1.pdf]
